# Supplementary material for: Contact investigation for tuberculosis: a systematic review and meta-analysis
Source: PubMed Central journal article supplement — Eur Respir J. 2012 Aug 30;41(1):140–56. doi: 10.1183/09031936.00070812 (PMC3533588; doi:10.1183/09031936.00070812), 2012-08-30
Supplement: supp_41.1.140_Web_appendix_4_-_Incidence_detail.pdf [file supp_41.1.140_Web_appendix_4_-_Incidence_detail.pdf]

## 4. Annual tuberculosis incidence rate among contacts for active disease

### A Annual incidence rate for tuberculosis in low-middle income countries

| Year of follow-up after exposure | Included studies | Contacts with active TB | Contacts screened | Incidence rate (cases/100,000/year) | 95% CI      | $\tau^2$ | $I^2$ |
|----------------------------------|------------------|-------------------------|-------------------|-------------------------------------|-------------|----------|-------|
| Year 1                           | 25               | 642                     | 35,986            | 1,478                               | 897 - 2,427 | 1.45     | 96.3  |
| Year 2                           | 19               | 256                     | 29,949            | 831                                 | 624 - 1,106 | 0.25     | 76.8  |
| Year 3                           | 7                | 150                     | 15,920            | 1,101                               | 757 - 1,599 | 0.19     | 84.4  |
| Year 4                           | 6                | 80                      | 15,544            | 492                                 | 344 - 704   | 0.02     | 24.1  |
| Year 5                           | 4                | 49                      | 8,929             | 549                                 | 415 - 726   | 0.00     | 0.0   |

### B Annual incidence rate for tuberculosis in high income countries

| Year of follow-up after exposure | Included studies | Contacts with active TB | Contacts screened | Incidence rate (cases/100,000/year) | 95% CI    | $\tau^2$ | $I^2$ |
|----------------------------------|------------------|-------------------------|-------------------|-------------------------------------|-----------|----------|-------|
| Year 1                           | 29               | 602                     | 109,161           | 524                                 | 336 - 816 | 1.23     | 93.6  |
| Year 2                           | 18               | 136                     | 94,180            | 152                                 | 74 - 314  | 1.92     | 93.7  |
| Year 3                           | 5                | 45                      | 41,922            | 233                                 | 80 - 673  | 1.32     | 93.7  |
| Year 4                           | 5                | 36                      | 41,922            | 202                                 | 69 - 593  | 1.35     | 92.7  |
| Year 5                           | 5                | 30                      | 41,922            | 171                                 | 49 - 598  | 1.86     | 94.3  |
